# Supplementary material for: Impact of short-term housing temperature alteration on metabolic parameters and adipose tissue in female mice
Source: Front Endocrinol (Lausanne). 2025 Jun 24;16:1617262. doi: 10.3389/fendo.2025.1617262 (PMC12234322; doi:10.3389/fendo.2025.1617262)
Supplement: Supplementary file 3 [file Table3.xlsx]

## Sheet: Common Pathway List
Symbol	Pathways	Entrez Gene Name	UniProt/Swiss-Prot Accession	Expr Log Ratio	Expr p-value	Expected	Location	Type(s)	Biomarker Application(s)	Drug(s)	Entrez Gene ID for Human	Entrez Gene ID for Mouse	Entrez Gene ID for Rat
ARHGEF1	Actin Cytoskeleton Signaling	Rho guanine nucleotide exchange factor 1	Q61210	0.72	0.04	Up	Cytoplasm	other	unspecified application	NA	9138	16801	60323
ARHGEF12	Actin Cytoskeleton Signaling	Rho guanine nucleotide exchange factor 12	Q8R4H2	-0.01	0.95	Up	Cytoplasm	other	NA	NA	23365	69632	367072
ARHGEF6	Actin Cytoskeleton Signaling	RacCdc42 guanine nucleotide exchange factor 6	Q8K4I3	0.3	0.26	Up	Cytoplasm	other	NA	NA	9459	73341	363509
CD14	Actin Cytoskeleton Signaling	CD14 molecule	P10810	0.21	0.06	NA	Plasma Membrane	transmembrane receptor	efficacy,unspecified application	NA	929	12475	60350
CFL1	Actin Cytoskeleton Signaling	cofilin 1	P18760	-0.02	0.9	Down	Nucleus	other	NA	NA	1072	12631	29271
CFL2	Actin Cytoskeleton Signaling	cofilin 2	P45591	-0.24	0.13	Down	Extracellular Space	other	NA	NA	1073	12632	366624
CSK	Actin Cytoskeleton Signaling	C-terminal Src kinase	P41241	0.49	0.14	Up	Cytoplasm	kinase	NA	bosutinib,bosutinib/imatinib,bosutinib/rituximab,SC-204303	1445	12988	315707
CYFIP1	Actin Cytoskeleton Signaling	cytoplasmic FMR1 interacting protein 1	Q7TMB8	-0.14	0.37	NA	Cytoplasm	translation regulator	NA	NA	23191	20430	308666
CYFIP2	Actin Cytoskeleton Signaling	cytoplasmic FMR1 interacting protein 2	Q5SQX6	1.14	0.04	NA	Cytoplasm	other	NA	NA	26999	76884	NA
DIAPH1	Actin Cytoskeleton Signaling	diaphanous related formin 1	O08808	0.41	0.28	Up	Plasma Membrane	other	NA	NA	1729	13367	307483
EZR	Actin Cytoskeleton Signaling	ezrin	P26040	0.94	0.08	Up	Plasma Membrane	other	prognosis	NA	7430	22350	54319
F2	Actin Cytoskeleton Signaling	coagulation factor II, thrombin	P19221	0.06	0.73	Up	Extracellular Space	peptidase	diagnosis,unspecified application	argatroban,aspirin/bivalirudin,aspirin/dabigatran etexilate,aspirin/eptifibatide/heparin,bivalirudin,dabigatran,dabigatran etexilate,desirudin,efegatran,enoxaparin,heparin,lepirudin,thrombin inhibitor,tinzaparin,ulinastatin,ximelagatran	2147	14061	29251
FLNA	Actin Cytoskeleton Signaling	filamin A	Q8BTM8	0.34	0.06	NA	Cytoplasm	other	unspecified application	NA	2316	192176	293860
FN1	Actin Cytoskeleton Signaling	fibronectin 1	P11276	-0.16	0.49	Up	Extracellular Space	other	diagnosis,efficacy,prognosis,unspecified application	AS1409,bifikafusp alfa,dodekin,iodine I 131 anti-fibronectin antibody fragment L19-SIP,L19-IL2 monoclonal antibody-cytokine fusion protein/L19TNFalpha,L19TNFalpha,ocriplasmin,PYX-201	2335	14268	25661
GNA13	Actin Cytoskeleton Signaling	G protein subunit alpha 13	P27601	0.01	0.94	Up	Plasma Membrane	enzyme	NA	NA	10672	14674	303634
IQGAP1	Actin Cytoskeleton Signaling	IQ motif containing GTPase activating protein 1	Q9JKF1	0.5	0.04	Down	Cytoplasm	other	NA	NA	8826	29875	361598
IQGAP2	Actin Cytoskeleton Signaling	IQ motif containing GTPase activating protein 2	Q3UQ44	0.22	0.19	Down	Cytoplasm	other	NA	NA	10788	544963	100360623
KNG1	Actin Cytoskeleton Signaling	NA	O08677	0.15	0.4	NA	Other	other	NA	NA	NA	NA	NA
LBP	Actin Cytoskeleton Signaling	lipopolysaccharide binding protein	Q61805	0.38	0.26	NA	Plasma Membrane	transporter	diagnosis,efficacy	NA	3929	16803	29469
MSN	Actin Cytoskeleton Signaling	moesin	P26041	0.69	0.09	Up	Plasma Membrane	other	NA	NA	4478	17698	81521
MYH1	Actin Cytoskeleton Signaling	myosin heavy chain 1	Q5SX40	0.08	0.86	Up	Plasma Membrane	enzyme	NA	NA	4619	17879	287408
MYH10	Actin Cytoskeleton Signaling	myosin heavy chain 10	Q61879	-0.15	0.45	Up	Cytoplasm	enzyme	unspecified application	NA	4628	77579	79433
MYH11	Actin Cytoskeleton Signaling	myosin heavy chain 11	O08638	0.5	0.29	Up	Cytoplasm	other	NA	NA	4629	17880	24582
MYH13	Actin Cytoskeleton Signaling	myosin heavy chain 13	B1AR69	0.68	0.57	Up	Cytoplasm	other	NA	NA	8735	544791	103693367
MYH14	Actin Cytoskeleton Signaling	myosin heavy chain 14	Q6URW6	0.2	0.65	Up	Extracellular Space	enzyme	NA	mavacamten	79784	71960	308572
MYH2	Actin Cytoskeleton Signaling	myosin heavy chain 2	G3UW82	1.11	0.33	Up	Cytoplasm	enzyme	NA	NA	4620	17882	691644
MYH3	Actin Cytoskeleton Signaling	myosin heavy chain 3	P13541	0.25	0.8	Up	Cytoplasm	enzyme	NA	NA	4621	17883	24583
MYH4	Actin Cytoskeleton Signaling	myosin heavy chain 4	Q5SX39	1.28	0.36	Up	Cytoplasm	enzyme	NA	NA	4622	17884	360543
MYH7	Actin Cytoskeleton Signaling	NA	Q91Z83	1.08	0.47	Up	Other	other	NA	NA	NA	NA	NA
MYH7B	Actin Cytoskeleton Signaling	myosin heavy chain 7B	A2AQP0	-0.31	0.33	Up	Cytoplasm	other	unspecified application	NA	57644	668940	311570
MYH8	Actin Cytoskeleton Signaling	NA	P13542	0.97	0.43	Up	Other	other	NA	NA	NA	NA	NA
MYH9	Actin Cytoskeleton Signaling	myosin heavy chain 9	Q8VDD5	0.68	0.07	Up	Cytoplasm	enzyme	unspecified application	NA	4627	17886	25745
MYL1	Actin Cytoskeleton Signaling	myosin light chain 1	P05977	1.08	0.59	Up	Cytoplasm	other	NA	NA	4632	17901	56781
MYL11	Actin Cytoskeleton Signaling	myosin light chain 11	P97457	1.42	0.44	Up	Cytoplasm	other	NA	NA	29895	17907	24584
MYL3	Actin Cytoskeleton Signaling	myosin light chain 3	P09542	-0.27	0.14	Up	Cytoplasm	other	NA	NA	4634	17897	24585
MYL6	Actin Cytoskeleton Signaling	myosin light chain 6	Q60605	0.05	0.74	Up	Cytoplasm	enzyme	NA	NA	4637	17904	685867
MYO18A	Actin Cytoskeleton Signaling	myosin XVIIIA	Q9JMH9	0.02	0.93	NA	Cytoplasm	other	NA	NA	399687	360013	360570
NCKAP1	Actin Cytoskeleton Signaling	NCK associated protein 1	P28660	-0.33	0.03	NA	Plasma Membrane	other	NA	NA	10787	50884	58823
NCKAP1L	Actin Cytoskeleton Signaling	NCK associated protein 1 like	Q8K1X4	-0.09	0.62	NA	Plasma Membrane	other	NA	NA	3071	105855	315348
PIP5K1A	Actin Cytoskeleton Signaling	phosphatidylinositol-4-phosphate 5-kinase type 1 alpha	P70182	-0.21	0.71	Up	Cytoplasm	kinase	NA	ISA-2011B,SM1-71	8394	18720	365865
CDK11A	EIF2 Signalling	NA	P24788	-0.25	0.77	Up	Other	other	NA	NA	NA	NA	NA
EIF2AK2	EIF2 Signalling	eukaryotic translation initiation factor 2 alpha kinase 2	Q03963	0.07	0.83	Up	Cytoplasm	kinase	NA	etavopivat,mitapivat	5610	19106	54287
EIF5	EIF2 Signalling	eukaryotic translation initiation factor 5	P59325	0.18	0.17	NA	Cytoplasm	translation regulator	NA	NA	1983	217869	108348073
EIF5B	EIF2 Signalling	eukaryotic translation initiation factor 5B	Q05D44	0.16	0.36	Up	Cytoplasm	translation regulator	NA	NA	9669	226982	308306
PPP1CA	EIF2 Signalling	protein phosphatase 1 catalytic subunit alpha	P62137	0.09	0.49	Up	Cytoplasm	phosphatase	NA	NA	5499	19045	24668
PTBP1	EIF2 Signalling	polypyrimidine tract binding protein 1	P17225	0.28	0.09	NA	Nucleus	enzyme	unspecified application	NA	5725	19205	29497
Ppp1cc	EIF2 Signalling	NA	P63087	0.06	0.7	Up	Other	other	NA	NA	NA	NA	NA
RPL10	EIF2 Signalling	ribosomal protein L10	Q6ZWV3	0.18	0.5	Up	Cytoplasm	translation regulator	NA	NA	6134	110954	81764
RPL10A	EIF2 Signalling	ribosomal protein L10a	P53026	-0.48	0.26	Up	Nucleus	other	NA	NA	4736	19896	81729
RPL11	EIF2 Signalling	ribosomal protein L11	Q9CXW4	-0.09	0.91	Up	Cytoplasm	other	NA	NA	6135	67025	362631
RPL12	EIF2 Signalling	NA	P35979	-0.3	0.23	Up	Other	other	NA	NA	NA	NA	NA
RPL13	EIF2 Signalling	NA	P47963	-0.35	0.07	Up	Other	other	NA	NA	NA	NA	NA
RPL13A	EIF2 Signalling	ribosomal protein L13a	P19253	-2.84	0.07	Up	Cytoplasm	other	NA	NA	23521	22121	317646
RPL14	EIF2 Signalling	ribosomal protein L14	Q9CR57	0.17	0.49	Up	Cytoplasm	other	NA	NA	9045	67115	65043
RPL15	EIF2 Signalling	ribosomal protein L15	Q9CZM2	-0.37	0.11	Up	Cytoplasm	other	NA	NA	6138	66480	245981
RPL17	EIF2 Signalling	NA	Q9CPR4	0.06	0.81	Up	Other	other	NA	NA	NA	NA	NA
RPL18	EIF2 Signalling	ribosomal protein L18	P35980	-0.39	0.13	Up	Cytoplasm	other	NA	NA	6141	19899	81766
RPL18A	EIF2 Signalling	ribosomal protein L18a	P62717	0.1	0.74	Up	Cytoplasm	other	NA	NA	6142	76808	290641
RPL19	EIF2 Signalling	ribosomal protein L19	P84099	0.56	0.25	Up	Cytoplasm	other	NA	NA	6143	19921	81767
RPL21	EIF2 Signalling	ribosomal protein L21	O09167	1.29	0.01	Up	Cytoplasm	other	NA	NA	6144	19933	79449
RPL22	EIF2 Signalling	ribosomal protein L22	P67984	-0.74	0.39	Up	Cytoplasm	translation regulator	NA	NA	6146	19934	81768
RPL22L1	EIF2 Signalling	ribosomal protein L22 like 1	Q9D7S7	0.05	0.92	Up	Cytoplasm	other	NA	NA	200916	68028	361923
RPL23	EIF2 Signalling	ribosomal protein L23	P62830	-0.42	0.41	Up	Cytoplasm	other	NA	NA	9349	65019	29282
RPL24	EIF2 Signalling	ribosomal protein L24	Q8BP67	0.44	0.45	Up	Cytoplasm	other	NA	NA	6152	68193	64307
RPL26	EIF2 Signalling	ribosomal protein L26	P61255	1.03	0.13	Up	Cytoplasm	other	NA	NA	6154	19941	287417
RPL27	EIF2 Signalling	ribosomal protein L27	P61358	1.07	0.09	Up	Cytoplasm	other	NA	NA	6155	19942	64306
RPL27A	EIF2 Signalling	ribosomal protein L27a	P14115	-0.13	0.64	Up	Cytoplasm	other	NA	NA	6157	26451	293418
RPL3	EIF2 Signalling	ribosomal protein L3	P27659	0.31	0.49	Up	Nucleus	other	NA	cytarabine/daunorubicin/omacetaxine mepesuccinate,cytarabine/doxorubicin/filgrastim/omacetaxine mepesuccinate,omacetaxine mepesuccinate	6122	27367	300079
RPL30	EIF2 Signalling	NA	P62889	0.25	0.24	Up	Other	other	NA	NA	NA	NA	NA
RPL31	EIF2 Signalling	ribosomal protein L31	P62900	0.23	0.3	Up	Cytoplasm	other	NA	NA	6160	114641	64298
RPL35A	EIF2 Signalling	ribosomal protein L35a	O55142	1.06	0.2	Up	Cytoplasm	other	NA	NA	6165	57808	57809
RPL38	EIF2 Signalling	ribosomal protein L38	Q9JJI8	1.14	0.08	Up	Cytoplasm	other	NA	NA	6169	67671	689284
RPL4	EIF2 Signalling	ribosomal protein L4	Q9D8E6	0.43	0.07	Up	Cytoplasm	enzyme	NA	NA	6124	67891	64302
RPL5	EIF2 Signalling	ribosomal protein L5	P47962	0.02	0.9	Up	Cytoplasm	other	NA	NA	6125	100503670	81763
RPL6	EIF2 Signalling	NA	P47911	0.11	0.88	Up	Other	other	NA	NA	NA	NA	NA
RPL7	EIF2 Signalling	ribosomal protein L7	P14148	0.42	0.04	Up	Nucleus	transcription regulator	NA	NA	6129	19989	297755
RPL8	EIF2 Signalling	ribosomal protein L8	P62918	-0.49	0.05	Up	Cytoplasm	other	NA	NA	6132	26961	26962
RPL9	EIF2 Signalling	NA	P51410	0.31	0.2	Up	Other	other	NA	NA	NA	NA	NA
Rpl34 (includes others)	EIF2 Signalling	NA	Q9D1R9	0.69	0.45	NA	Other	other	NA	NA	NA	NA	NA
AP2A2	Huntingtons Disease Signaling	adaptor related protein complex 2 subunit alpha 2	P17427	0.16	0.19	NA	Cytoplasm	transporter	NA	NA	161	11772	81637
APAF1	Huntingtons Disease Signaling	apoptotic peptidase activating factor 1	O88879	-1.17	0.02	Down	Cytoplasm	other	diagnosis	NA	317	11783	78963
ARFIP2	Huntingtons Disease Signaling	ADP ribosylation factor interacting protein 2	Q8K221	-0.29	0.52	Down	Cytoplasm	other	NA	NA	23647	76932	293344
BCL2L1	Huntingtons Disease Signaling	BCL2 like 1	Q64373	0.44	0.32	Up	Cytoplasm	other	efficacy,prognosis	AZD0466,LP-118	598	12048	24888
CASP1	Huntingtons Disease Signaling	NA	P29452	-0.06	0.91	Down	Other	other	NA	NA	NA	NA	NA
CASP6	Huntingtons Disease Signaling	caspase 6	O08738	0.65	0.35	Down	Cytoplasm	peptidase	NA	NA	839	12368	83584
CASP7	Huntingtons Disease Signaling	caspase 7	P97864	-0.2	0.76	Down	Cytoplasm	peptidase	NA	NA	840	12369	64026
CASP8	Huntingtons Disease Signaling	caspase 8	O89110	-0.03	0.93	Down	Nucleus	peptidase	diagnosis,efficacy,prognosis	NA	841	12370	64044
CASQ1	Huntingtons Disease Signaling	calsequestrin 1	O09165	0.01	0.96	Down	Cytoplasm	other	unspecified application	NA	844	12372	686019
CDK5	Huntingtons Disease Signaling	cyclin dependent kinase 5	P49615	0.25	0.51	Up	Nucleus	kinase	unspecified application	(2S)-2-{[9-(propan-2-yl)-6-({[4-(pyridin-2-yl)phenyl]methyl}amino)-9H-purin-2-yl]amino}butan-1-ol,aloisine A,alvocidib,CYC065,dinaciclib,TFP5	1020	12568	140908
CLTA	Huntingtons Disease Signaling	clathrin light chain A	O08585	0.61	0.3	NA	Plasma Membrane	other	NA	NA	1211	12757	83800
CLTB	Huntingtons Disease Signaling	clathrin light chain B	Q6IRU5	0.37	0.33	NA	Plasma Membrane	other	NA	NA	1212	74325	116561
CLTC	Huntingtons Disease Signaling	clathrin heavy chain	Q68FD5	0.34	0.02	NA	Plasma Membrane	other	NA	NA	1213	67300	54241
CTSD	Huntingtons Disease Signaling	cathepsin D	P18242	0.02	0.91	NA	Cytoplasm	peptidase	diagnosis,unspecified application	NA	1509	13033	171293
DCTN1	Huntingtons Disease Signaling	dynactin subunit 1	O08788	-0.08	0.48	NA	Cytoplasm	other	NA	NA	1639	13191	29167
DNM1	Huntingtons Disease Signaling	dynamin 1	P39053	-0.37	0.17	NA	Cytoplasm	enzyme	NA	NA	1759	13429	140694
DNM2	Huntingtons Disease Signaling	dynamin 2	P39054	0.16	0.21	NA	Plasma Membrane	enzyme	NA	NA	1785	13430	25751
DNM3	Huntingtons Disease Signaling	dynamin 3	Q8BZ98	0.12	0.26	NA	Cytoplasm	enzyme	NA	NA	26052	103967	171574
EGFR	Huntingtons Disease Signaling	epidermal growth factor receptor	Q01279	-0.31	0.18	Up	Plasma Membrane	kinase	diagnosis,disease progression,efficacy,prognosis,response to therapy,safety,unspecified application	111In-panitumumab,11C-osimertinib,18F-PEG6-IPQA,4-[(3-bromophenyl)amino]-6,7-diethoxyquinazoline,89Zr-DFO-nimotuzumab,89Zr-panitumumab,ABBV-637,ABT-414,ABY-029,AEE 788,AF8c,afatinib,afatinib/cetuximab,afatinib/dasatinib,afatinib/osimertinib,afatinib/paclitaxel,AFM24,alflutinib,allitinib,ametumumab,AMG 595,AMG 596,amivantamab,anastrozole/lapatinib,anastrozole/lapatinib/trastuzumab,anti-EGFR antibo…	1956	13649	24329
GNA11	Huntingtons Disease Signaling	G protein subunit alpha 11	P21278	-0.43	0.02	Up	Plasma Membrane	enzyme	unspecified application	NA	2767	14672	81662
GNAQ	Huntingtons Disease Signaling	G protein subunit alpha q	P21279	-0.24	0.15	Up	Plasma Membrane	enzyme	unspecified application	NA	2776	14682	81666
GNB1	Huntingtons Disease Signaling	G protein subunit beta 1	P62874	-0.19	0.17	Up	Plasma Membrane	enzyme	NA	NA	2782	14688	24400
GNB2	Huntingtons Disease Signaling	G protein subunit beta 2	P62880	-0.82	0.03	NA	Plasma Membrane	other	NA	NA	2783	14693	81667
GNB4	Huntingtons Disease Signaling	G protein subunit beta 4	P29387	0.22	0.23	NA	Plasma Membrane	other	NA	NA	59345	14696	294962
GNG2	Huntingtons Disease Signaling	G protein subunit gamma 2	P63213	0.07	0.91	Up	Plasma Membrane	other	NA	NA	54331	14702	80850
GNG7	Huntingtons Disease Signaling	G protein subunit gamma 7	Q61016	-0.06	0.79	Up	Plasma Membrane	other	NA	NA	2788	14708	58979
GOSR1	Huntingtons Disease Signaling	golgi SNAP receptor complex member 1	O88630	-0.21	0.72	NA	Cytoplasm	transporter	NA	NA	9527	53334	94189
GOSR2	Huntingtons Disease Signaling	golgi SNAP receptor complex member 2	O35166	-0.02	0.96	NA	Cytoplasm	transporter	NA	NA	9570	56494	64154
HDAC1	Huntingtons Disease Signaling	histone deacetylase 1	O09106	0.17	0.31	NA	Nucleus	enzyme	efficacy	belinostat,bocodepsin,bortezomib/vorinostat,domatinostat,HDAC class I inhibitors,HG146,mocetinostat,purinostat,pyroxamide,R 306465,TNG260,trametinib/vorinostat,tributyrin,vorinostat	3065	433759	297893
HDAC2	Huntingtons Disease Signaling	histone deacetylase 2	P70288	-0.15	0.29	NA	Nucleus	transcription regulator	NA	belinostat,bortezomib/vorinostat,chidamide,domatinostat,HG146,histone deacetylase class II inhibitors,purinostat,pyroxamide,theophylline,trametinib/vorinostat,tributyrin,vorinostat	3066	15182	84577
HIP1	Huntingtons Disease Signaling	huntingtin interacting protein 1	Q8VD75	-0.18	0.3	Down	Cytoplasm	other	NA	NA	3092	215114	192154
NAPA	Huntingtons Disease Signaling	NSF attachment protein alpha	Q9DB05	-0.08	0.49	NA	Cytoplasm	transporter	NA	NA	8775	108124	140673
NAPG	Huntingtons Disease Signaling	NSF attachment protein gamma	Q9CWZ7	-0.01	0.97	NA	Cytoplasm	transporter	NA	NA	8774	108123	307382
NSF	Huntingtons Disease Signaling	N-ethylmaleimide sensitive factor, vesicle fusing ATPase	P46460	0.08	0.56	NA	Cytoplasm	transporter	NA	NA	4905	18195	60355
PLCB1	Huntingtons Disease Signaling	phospholipase C beta 1	Q9Z1B3	-0.4	0.37	Up	Cytoplasm	enzyme	NA	NA	23236	18795	24654
PLCB3	Huntingtons Disease Signaling	phospholipase C beta 3	P51432	-0.44	0.06	Up	Cytoplasm	enzyme	NA	NA	5331	18797	29322
PLCB4	Huntingtons Disease Signaling	phospholipase C beta 4	Q91UZ1	-0.38	0.64	Up	Cytoplasm	enzyme	NA	NA	5332	18798	25031
POLR2A	Huntingtons Disease Signaling	RNA polymerase II subunit A	P08775	-0.21	0.1	NA	Nucleus	enzyme	NA	NA	5430	20020	363633
POLR2B	Huntingtons Disease Signaling	RNA polymerase II subunit B	Q8CFI7	0.31	0.25	NA	Nucleus	enzyme	NA	NA	5431	231329	289561
POLR2D	Huntingtons Disease Signaling	RNA polymerase II subunit D	Q9D7M8	0.78	0.06	NA	Nucleus	enzyme	NA	NA	5433	69241	364834
POLR2G	Huntingtons Disease Signaling	RNA polymerase II subunit G	P62488	-0.91	0.19	NA	Nucleus	enzyme	NA	NA	5436	67710	117017
POLR2H	Huntingtons Disease Signaling	RNA polymerase II, I and III subunit H	Q923G2	1.03	0.14	NA	Nucleus	enzyme	NA	NA	5437	245841	498109
POLR2L	Huntingtons Disease Signaling	RNA polymerase II, I and III subunit L	P62876	-1.87	0.04	NA	Nucleus	enzyme	NA	NA	5441	66491	502374
ARF4	Integrin Signalling	ADP ribosylation factor 4	P61750	0.21	0.62	Down	Cytoplasm	enzyme	NA	NA	378	11843	79120
ARF5	Integrin Signalling	ADP ribosylation factor 5	P84084	0.44	0.26	Down	Cytoplasm	enzyme	NA	NA	381	11844	79117
ARF6	Integrin Signalling	ADP ribosylation factor 6	P62331	1.21	0.06	Down	Plasma Membrane	transporter	NA	NA	382	11845	79121
ARHGAP26	Integrin Signalling	Rho GTPase activating protein 26	Q6ZQ82	0.77	0.1	Down	Cytoplasm	other	NA	NA	23092	71302	307459
ARHGAP5	Integrin Signalling	Rho GTPase activating protein 5	P97393	-0.45	0.12	Up	Cytoplasm	enzyme	NA	NA	394	11855	299012
ASAP1	Integrin Signalling	ArfGAP with SH3 domain, ankyrin repeat and PH domain 1	Q9QWY8	-0.17	0.5	Up	Plasma Membrane	other	NA	NA	50807	13196	314961
Arf2	Integrin Signalling	NA	Q8BSL7	0.03	0.9	Down	Other	other	NA	NA	NA	NA	NA
CAV1	Integrin Signalling	caveolin 1	P49817	-0.09	0.53	Up	Plasma Membrane	transmembrane receptor	diagnosis	daprodustat	857	12389	25404
CTTN	Integrin Signalling	cortactin	Q60598	0.09	0.59	Up	Plasma Membrane	other	efficacy	NA	2017	13043	60465
FYN	Integrin Signalling	FYN proto-oncogene, Src family tyrosine kinase	P39688	0.32	0.09	Up	Plasma Membrane	kinase	efficacy,unspecified application	corticosteroid/dasatinib,cytarabine/dasatinib/dexamethasone/methotrexate,dasatinib,dasatinib/dexamethasone,dasatinib/dexamethasone/vincristine,dasatinib/inotuzumab ozogamicin,dasatinib/rituximab,JNJ-26483327,PD 173958,PD162531,PP1,PP2/AG1879 tyrosine kinase inhibitor,SM1-71	2534	14360	25150
ILK	Integrin Signalling	integrin linked kinase	O55222	0	0.99	Up	Plasma Membrane	kinase	NA	KP-SD-1,OSU-T315	3611	16202	170922
ILKAP	Integrin Signalling	ILK associated serinethreonine phosphatase	Q8R0F6	-0.23	0.44	Down	Cytoplasm	phosphatase	NA	NA	80895	67444	64538
LIMS1	Integrin Signalling	LIM zinc finger domain containing 1	Q99JW4	-0.29	0.1	Up	Plasma Membrane	other	NA	NA	3987	110829	499443
NCK1	Integrin Signalling	NCK adaptor protein 1	Q99M51	-0.16	0.21	Up	Cytoplasm	kinase	NA	NA	4690	17973	300955
NCK2	Integrin Signalling	NCK adaptor protein 2	O55033	-0.07	0.87	Up	Cytoplasm	kinase	NA	NA	8440	17974	316369
PARVA	Integrin Signalling	parvin alpha	Q9EPC1	-0.21	0.1	Up	Cytoplasm	other	NA	NA	55742	57342	57341
PARVB	Integrin Signalling	parvin beta	Q9ES46	0.21	0.68	Down	Cytoplasm	other	NA	NA	29780	170736	362973
PIKFYVE	Integrin Signalling	phosphoinositide kinase, FYVE-type zinc finger containing	Q9Z1T6	-0.06	0.88	Up	Cytoplasm	kinase	NA	apilimod,APY0201	200576	18711	316457
PLCG1	Integrin Signalling	phospholipase C gamma 1	Q62077	-0.06	0.92	Up	Cytoplasm	enzyme	NA	NA	5335	18803	25738
PLCG2	Integrin Signalling	phospholipase C gamma 2	Q8CIH5	1.2	0.03	Up	Cytoplasm	enzyme	NA	NA	5336	234779	29337
PPP1R12A	Integrin Signalling	protein phosphatase 1 regulatory subunit 12A	Q9DBR7	0.19	0.27	NA	Cytoplasm	phosphatase	NA	NA	4659	17931	116670
PTK2	Integrin Signalling	protein tyrosine kinase 2	P34152	0.51	0.05	Up	Cytoplasm	kinase	diagnosis,disease progression,efficacy,prognosis	APG-2449,BI 853520,conteltinib,CTX-0294945,lorlatinib,NVP-TAE 226,PF-431396,PF-573228,repotrectinib,SM1-71	5747	14083	25614
PXN	Integrin Signalling	paxillin	Q8VI36	0.23	0.54	Up	Cytoplasm	other	efficacy,prognosis,unspecified application	NA	5829	19303	360820
Ppp1r12b	Integrin Signalling	NA	Q8BG95	-0.27	0.1	NA	Other	other	NA	NA	NA	NA	NA
ACO2	Mitochondria Dysfunction	aconitase 2	Q99KI0	-0.25	0.24	Down	Cytoplasm	enzyme	NA	NA	50	11429	79250
ADRB3	Mitochondria Dysfunction	adrenoceptor beta 3	P25962	-0.08	0.73	Down	Plasma Membrane	G-protein coupled receptor	diagnosis,unspecified application	arbutamine,articaine/epinephrine,bimatoprost/timolol,carteolol,carvedilol,carvedilol/enalapril,cisplatin/epinephrine,dexamethasone/olanzapine,dipivefrin,dobutamine,dorzolamide/timolol,droxidopa,ephedrine,epinephrine,epinephrine/lidocaine,epinephrine/methotrexate,epinephrine/prilocaine,esmolol,fluoxetine/olanzapine,guanadrel,guanethidine,hydrochlorothiazide/propranolol,hydrochlorothiazide/timolol,…	155	11556	25645
AIFM1	Mitochondria Dysfunction	apoptosis inducing factor mitochondria associated 1	Q9Z0X1	-0.23	0.19	Up	Cytoplasm	enzyme	NA	NA	9131	26926	83533
ATP12A	Mitochondria Dysfunction	ATPase H+K+ transporting non-gastric alpha2 subunit	Q9Z1W8	0.49	0.06	Up	Plasma Membrane	transporter	NA	aspirin/omeprazole,clarithromycin/omeprazole,diclofenac/omeprazole,omeprazole,pantoprazole,vonoprazan	479	192113	171028
ATP1A1	Mitochondria Dysfunction	ATPase Na+K+ transporting subunit alpha 1	Q8VDN2	0.22	0.11	Up	Plasma Membrane	transporter	NA	acetyldigitoxin derivative,bretylium,ciclopirox olamine,digitoxin,digoxin,ethacrynic acid,ouabain,perphenazine,reserpine/trichloromethiazide,trichloromethiazide	476	11928	24211
ATP1A2	Mitochondria Dysfunction	NA	Q6PIE5	-0.54	0.12	Up	Other	other	NA	NA	NA	NA	NA
ATP1A3	Mitochondria Dysfunction	ATPase Na+K+ transporting subunit alpha 3	Q6PIC6	-0.24	0.5	Up	Plasma Membrane	transporter	NA	digoxin,ethacrynic acid,perphenazine	478	232975	24213
ATP1A4	Mitochondria Dysfunction	ATPase Na+K+ transporting subunit alpha 4	Q9WV27	0.05	0.7	Up	Plasma Membrane	transporter	NA	digoxin,ethacrynic acid,perphenazine	480	27222	29132
ATP1B1	Mitochondria Dysfunction	ATPase Na+K+ transporting subunit beta 1	P14094	0.35	0.34	Up	Plasma Membrane	transporter	NA	NA	481	11931	25650
ATP1B2	Mitochondria Dysfunction	ATPase Na+K+ transporting subunit beta 2	P14231	0.27	0.65	Up	Plasma Membrane	transporter	NA	NA	482	11932	24214
ATP1B3	Mitochondria Dysfunction	ATPase Na+K+ transporting subunit beta 3	P97370	0.36	0.07	Up	Plasma Membrane	transporter	NA	NA	483	11933	25390
ATP5MF	Mitochondria Dysfunction	ATP synthase membrane subunit f	P56135	-0.12	0.76	Down	Cytoplasm	transporter	NA	NA	9551	57423	690441
ATP5MG	Mitochondria Dysfunction	ATP synthase membrane subunit g	Q9CPQ8	0.58	0.03	Down	Cytoplasm	enzyme	NA	NA	10632	27425	300677
ATP5PD	Mitochondria Dysfunction	ATP synthase peripheral stalk subunit d	Q9DCX2	-0.21	0.31	Down	Cytoplasm	enzyme	NA	NA	10476	71679	641434
ATP5PO	Mitochondria Dysfunction	ATP synthase peripheral stalk subunit OSCP	Q9DB20	0.07	0.54	Down	Cytoplasm	transporter	NA	NA	539	28080	192241
ATPAF1	Mitochondria Dysfunction	ATP synthase mitochondrial F1 complex assembly factor 1	Q811I0	0.14	0.55	Down	Cytoplasm	other	NA	NA	64756	230649	313510
ATPAF2	Mitochondria Dysfunction	ATP synthase mitochondrial F1 complex assembly factor 2	Q91YY4	0.21	0.38	Down	Cytoplasm	other	NA	NA	91647	246782	303190
BAD	Mitochondria Dysfunction	BCL2 associated agonist of cell death	Q61337	-0.11	0.61	Up	Cytoplasm	other	efficacy	NA	572	12015	64639
BID	Mitochondria Dysfunction	BH3 interacting domain death agonist	P70444	0.31	0.07	Up	Cytoplasm	other	NA	NA	637	12122	64625
CACNA1S	Mitochondria Dysfunction	calcium voltage-gated channel subunit alpha1 S	Q02789	-0.15	0.21	Down	Plasma Membrane	ion channel	NA	aliskiren/amlodipine,aliskiren/amlodipine/hydrochlorothiazide,amlodipine,amlodipine/atorvastatin,amlodipine/benazepril,amlodipine/celecoxib,amlodipine/ezetimibe/losartan/rosuvastatin,amlodipine/hydrochlorothiazide,amlodipine/hydrochlorothiazide/valsartan,amlodipine/indapamide/perindopril,amlodipine/perindopril,amlodipine/telmisartan,amlodipine/valsartan,bepridil,cinnarizine,dexamethasone/rituxima…	779	12292	682930
CACNA2D1	Mitochondria Dysfunction	calcium voltage-gated channel auxiliary subunit alpha2delta 1	O08532	0.64	0.25	Down	Plasma Membrane	ion channel	NA	aliskiren/amlodipine,amlodipine,amlodipine/hydrochlorothiazide/olmesartan medoxomil,amlodipine/hydrochlorothiazide/valsartan,amlodipine/telmisartan,bepridil,enalapril/felodipine,felodipine,gabapentin,isradipine,nicardipine,nifedipine,nilvadipine,nisoldipine,nitrendipine,pregabalin	781	12293	25399
CACNB1	Mitochondria Dysfunction	calcium voltage-gated channel auxiliary subunit beta 1	Q8R3Z5	0.04	0.94	Down	Plasma Membrane	ion channel	NA	dexamethasone/rituximab/verapamil,ibutilide,mibefradil,nimodipine,trandolapril/verapamil,verapamil	782	12295	50688
CACNB3	Mitochondria Dysfunction	calcium voltage-gated channel auxiliary subunit beta 3	P54285	-0.26	0.23	Down	Plasma Membrane	ion channel	NA	dexamethasone/rituximab/verapamil,mibefradil,nimodipine,trandolapril/verapamil,verapamil	784	12297	25297
CAMK2A	Mitochondria Dysfunction	calciumcalmodulin dependent protein kinase II alpha	P11798	-0.03	0.79	Up	Cytoplasm	kinase	NA	NA	815	12322	25400
CAMK2B	Mitochondria Dysfunction	calciumcalmodulin dependent protein kinase II beta	P28652	0.12	0.45	Up	Cytoplasm	kinase	NA	NA	816	12323	24245
CAMK2D	Mitochondria Dysfunction	calciumcalmodulin dependent protein kinase II delta	Q6PHZ2	0.15	0.31	Up	Cytoplasm	kinase	NA	NA	817	108058	24246
CAMK2G	Mitochondria Dysfunction	calciumcalmodulin dependent protein kinase II gamma	Q923T9	-0.07	0.74	Up	Cytoplasm	kinase	NA	NA	818	12325	171140
CHP1	Mitochondria Dysfunction	calcineurin like EF-hand protein 1	P61022	-0.39	0.05	Up	Nucleus	transcription regulator	NA	alemtuzumab/cyclosporin A,basiliximab/cyclosporine,cyclosporin A,cyclosporin A/methotrexate,cyclosporine A/sirolimus/tacrolimus,cyclosporine A/tacrolimus,voclosporin	11261	56398	64152
COX15	Mitochondria Dysfunction	cytochrome c oxidase assembly homolog COX15	Q8BJ03	-0.64	0.04	Down	Cytoplasm	enzyme	NA	NA	1355	226139	309391
COX4I1	Mitochondria Dysfunction	cytochrome c oxidase subunit 4I1	P19783	0.84	0.18	Down	Cytoplasm	enzyme	NA	NA	1327	12857	29445
COX5A	Mitochondria Dysfunction	cytochrome c oxidase subunit 5A	P12787	-0.07	0.75	Down	Cytoplasm	enzyme	NA	NA	9377	12858	252934
COX6A1	Mitochondria Dysfunction	cytochrome c oxidase subunit 6A1	P43024	0.33	0.54	Down	Cytoplasm	enzyme	NA	NA	1337	12861	25282
COX6B1	Mitochondria Dysfunction	cytochrome c oxidase subunit 6B1	P56391	-0.15	0.86	Down	Cytoplasm	enzyme	NA	NA	1340	110323	688869
COX7A1	Mitochondria Dysfunction	cytochrome c oxidase subunit 7A1	P56392	0.13	0.77	Down	Cytoplasm	enzyme	NA	NA	1346	12865	687508
COX7A2	Mitochondria Dysfunction	cytochrome c oxidase subunit 7A2	P48771	0.32	0.64	Down	Cytoplasm	enzyme	NA	NA	1347	12866	29507
COX7A2L	Mitochondria Dysfunction	cytochrome c oxidase subunit 7A2 like	Q61387	0.62	0.37	Down	Cytoplasm	enzyme	NA	NA	9167	20463	298762
CPOX	Mitochondria Dysfunction	coproporphyrinogen oxidase	P36552	-0.6	0.07	Up	Cytoplasm	enzyme	NA	NA	1371	12892	304024
CYB5A	Mitochondria Dysfunction	cytochrome b5 type A	P56395	-0.02	0.97	Down	Cytoplasm	enzyme	NA	NA	1528	109672	64001
CYB5B	Mitochondria Dysfunction	cytochrome b5 type B	Q9CQX2	-0.06	0.83	Down	Cytoplasm	enzyme	NA	NA	80777	66427	80773
Calm1 (includes others)	Mitochondria Dysfunction	NA	P0DP28	0.69	0.09	Up	Other	other	NA	NA	NA	NA	NA
Cox6c	Mitochondria Dysfunction	NA	Q9CPQ1	0.35	0.15	Down	Other	other	NA	NA	NA	NA	NA
DHODH	Mitochondria Dysfunction	dihydroorotate dehydrogenase (quinone)	O35435	0.2	0.58	Down	Cytoplasm	enzyme	NA	AG-636,ASLAN003,BAY2402234,brequinar,dichloroallyl lawsone,JNJ-74856665,leflunomide,RP7214,teriflunomide,vidofludimus	1723	56749	65156
DLAT	Mitochondria Dysfunction	dihydrolipoamide S-acetyltransferase	Q8BMF4	-0.1	0.56	Down	Cytoplasm	enzyme	NA	NA	1737	235339	81654
DLD	Mitochondria Dysfunction	dihydrolipoamide dehydrogenase	O08749	-0.25	0.11	Down	Cytoplasm	enzyme	NA	hexachlorophene	1738	13382	298942
FIS1	Mitochondria Dysfunction	fission, mitochondrial 1	Q9CQ92	0.29	0.56	Up	Cytoplasm	other	NA	NA	51024	66437	288584
GPD2	Mitochondria Dysfunction	glycerol-3-phosphate dehydrogenase 2	Q64521	-0.29	0.22	Down	Cytoplasm	enzyme	NA	NA	2820	14571	25062
GPX1	Mitochondria Dysfunction	glutathione peroxidase 1	P11352	0.08	0.67	Down	Cytoplasm	enzyme	diagnosis,efficacy	NA	2876	14775	24404
GPX3	Mitochondria Dysfunction	glutathione peroxidase 3	P46412	-0.41	0.1	Down	Extracellular Space	enzyme	unspecified application	NA	2878	14778	64317
GPX4	Mitochondria Dysfunction	glutathione peroxidase 4	O70325	-0.01	0.9	Down	Cytoplasm	enzyme	NA	NA	2879	625249	29328
GPX7	Mitochondria Dysfunction	glutathione peroxidase 7	Q99LJ6	0.75	0.14	Down	Cytoplasm	enzyme	NA	NA	2882	67305	298376
GPX8	Mitochondria Dysfunction	glutathione peroxidase 8 (putative)	Q9D7B7	-0.81	0.57	Down	Cytoplasm	enzyme	NA	NA	493869	69590	294744
GSR	Mitochondria Dysfunction	glutathione-disulfide reductase	P47791	0.18	0.26	NA	Cytoplasm	enzyme	NA	carmustine,carmustine/prednisone	2936	14782	116686
GSTK1	Mitochondria Dysfunction	glutathione S-transferase kappa 1	Q9DCM2	-0.4	0.02	Down	Cytoplasm	enzyme	NA	NA	373156	76263	297029
GSTM1	Mitochondria Dysfunction	NA	P15626	-0.03	0.78	Down	Other	other	NA	NA	NA	NA	NA
GSTM2	Mitochondria Dysfunction	NA	Q80W21	-0.32	0.27	Down	Other	other	NA	NA	NA	NA	NA
GSTP1	Mitochondria Dysfunction	NA	P19157	0.78	0.2	Down	Other	other	NA	NA	NA	NA	NA
GSTT2/GSTT2B	Mitochondria Dysfunction	NA	Q61133	-0.4	0.04	Down	Other	other	NA	NA	NA	NA	NA
GSTZ1	Mitochondria Dysfunction	glutathione S-transferase zeta 1	Q9WVL0	-0.22	0.38	Down	Cytoplasm	enzyme	NA	NA	2954	14874	681913
Gsta4	Mitochondria Dysfunction	glutathione S-transferase, alpha 4	P24472	0.81	0.47	Down	Cytoplasm	enzyme	NA	NA	NA	14860	300850
Gstt1	Mitochondria Dysfunction	NA	Q64471	-0.09	0.46	Down	Other	other	NA	NA	NA	NA	NA
Gstt3	Mitochondria Dysfunction	glutathione S-transferase, theta 3	Q99L20	0.6	0.11	Down	Other	enzyme	NA	NA	NA	103140	NA
HSD17B10	Mitochondria Dysfunction	hydroxysteroid 17-beta dehydrogenase 10	O08756	0.29	0.38	Down	Cytoplasm	enzyme	NA	NA	3028	15108	63864
HTRA2	Mitochondria Dysfunction	HtrA serine peptidase 2	Q9JIY5	1.08	0.05	Up	Cytoplasm	peptidase	NA	NA	27429	64704	297376
ITPR2	Mitochondria Dysfunction	inositol 1,4,5-trisphosphate receptor type 2	Q9Z329	0.09	0.9	Down	Cytoplasm	ion channel	NA	NA	3709	16439	81678
ITPR3	Mitochondria Dysfunction	inositol 1,4,5-trisphosphate receptor type 3	P70227	-0.1	0.79	Down	Cytoplasm	ion channel	NA	NA	3710	16440	25679
MAOA	Mitochondria Dysfunction	monoamine oxidase A	Q64133	-0.17	0.23	Up	Cytoplasm	enzyme	unspecified application	4-methylthioamphetamine,benzphetamine,CX-1370,dextroamphetamine,fenfluramine/phentermine,iproniazid,isocarboxazid,ladostigil,MAO-A inhibitor,methamphetamine,moclobemide,N-(2-indanyl)glycinamide,phenelzine,phentermine,phentermine/topiramate,procainamide,tranylcypromine	4128	17161	29253
MAOB	Mitochondria Dysfunction	monoamine oxidase B	Q8BW75	-0.26	0.15	Up	Cytoplasm	enzyme	NA	benzphetamine,dextroamphetamine,fenfluramine/phentermine,isocarboxazid,ladostigil,levodopa/rasagiline,MAO-B inhibitor,methamphetamine,pargyline,phenelzine,phentermine,phentermine/topiramate,procainamide,rasagiline,safinamide,selegiline,tranylcypromine	4129	109731	25750
MCU	Mitochondria Dysfunction	mitochondrial calcium uniporter	Q3UMR5	-0.58	0.41	Up	Cytoplasm	ion channel	NA	NA	90550	215999	294560
MFN1	Mitochondria Dysfunction	mitofusin 1	Q811U4	1.46	0.11	Down	Cytoplasm	enzyme	NA	NA	55669	67414	192647
MFN2	Mitochondria Dysfunction	mitofusin 2	Q80U63	-0.48	0.11	Down	Cytoplasm	enzyme	unspecified application	NA	9927	170731	64476
MGST1	Mitochondria Dysfunction	microsomal glutathione S-transferase 1	Q91VS7	0.24	0.42	Down	Cytoplasm	enzyme	NA	NA	4257	56615	171341
MGST3	Mitochondria Dysfunction	microsomal glutathione S-transferase 3	Q9CPU4	-0.15	0.86	Down	Cytoplasm	enzyme	NA	NA	4259	66447	289197
MT-CO1	Mitochondria Dysfunction	cytochrome c oxidase subunit I	P00397	-1.28	0.06	Down	Cytoplasm	enzyme	NA	acetaminophen/ibuprofen,chlorpheniramine/ibuprofen/phenylephrine,esomeprazole/naproxen,famotidine/ibuprofen,hydrocodone/ibuprofen,ibuprofen,ibuprofen/phenylephrine,indomethacin,naproxen,naproxen/sumatriptan,oxaprozin	4512	17708	26195
AKT1S1	mTOR Signaling	AKT1 substrate 1	Q9D1F4	-0.5	0.38	Up	Cytoplasm	other	efficacy	NA	84335	67605	292887
DGKZ	mTOR Signaling	diacylglycerol kinase zeta	Q80UP3	1.11	0.26	Up	Cytoplasm	kinase	NA	ASP1570	8525	104418	81821
EIF4B	mTOR Signaling	eukaryotic translation initiation factor 4B	Q8BGD9	0	0.99	Up	Cytoplasm	translation regulator	unspecified application	NA	1975	75705	300253
FKBP1A	mTOR Signaling	FKBP prolyl isomerase 1A	P26883	0.28	0.77	Up	Cytoplasm	enzyme	unspecified application	corticosteroid/everolimus/tacrolimus,corticosteroid/sirolimus,cyclosporine A/sirolimus/tacrolimus,cyclosporine A/tacrolimus,everolimus,everolimus/exemestane,everolimus/fulvestrant,everolimus/gefitinib,everolimus/letrozole,everolimus/paclitaxel,everolimus/pasireotide,everolimus/ribociclib,everolimus/tamoxifen,imatinib/sirolimus,lenalidomide/temsirolimus,metformin/sirolimus,methotrexate/sirolimus/t…	2280	14225	25639
GPLD1	mTOR Signaling	glycosylphosphatidylinositol specific phospholipase D1	O70362	-0.07	0.65	Up	Cytoplasm	enzyme	NA	NA	2822	14756	291132
HMOX1	mTOR Signaling	heme oxygenase 1	P14901	-0.1	0.65	Up	Cytoplasm	enzyme	efficacy,safety,unspecified application	tin mesoporphyrin	3162	15368	24451
MLST8	mTOR Signaling	MTOR associated protein, LST8 homolog	Q9DCJ1	0.49	0.55	Up	Cytoplasm	other	NA	NA	64223	56716	64226
NAPEPLD	mTOR Signaling	N-acyl phosphatidylethanolamine phospholipase D	Q8BH82	0.06	0.76	Up	Cytoplasm	enzyme	NA	NA	222236	242864	296757
PLD3	mTOR Signaling	phospholipase D family member 3	O35405	0.66	0.16	Up	Cytoplasm	enzyme	NA	NA	23646	18807	361527
PLD4	mTOR Signaling	phospholipase D family member 4	Q8BG07	0.67	0.16	Up	Extracellular Space	enzyme	NA	NA	122618	104759	362792
PRKAA1	mTOR Signaling	protein kinase AMP-activated catalytic subunit alpha 1	Q5EG47	-0.32	0.09	Down	Cytoplasm	kinase	NA	phenformin	5562	105787	65248
PRKAA2	mTOR Signaling	protein kinase AMP-activated catalytic subunit alpha 2	Q8BRK8	0.2	0.77	Down	Cytoplasm	kinase	NA	NA	5563	108079	78975
PRKAB1	mTOR Signaling	protein kinase AMP-activated non-catalytic subunit beta 1	Q9R078	-0.88	0.1	Down	Nucleus	kinase	NA	NA	5564	19079	83803
PRKAB2	mTOR Signaling	protein kinase AMP-activated non-catalytic subunit beta 2	Q6PAM0	1.87	0.03	Down	Cytoplasm	kinase	NA	NA	5565	108097	64562
PRKAG1	mTOR Signaling	protein kinase AMP-activated non-catalytic subunit gamma 1	O54950	0.4	0.03	Down	Nucleus	kinase	NA	NA	5571	19082	25520
PRKAG2	mTOR Signaling	protein kinase AMP-activated non-catalytic subunit gamma 2	Q91WG5	-0.03	0.88	Down	Cytoplasm	kinase	NA	NA	51422	108099	373545
RHEB	mTOR Signaling	Ras homolog, mTORC1 binding	Q921J2	0.01	0.98	Up	Cytoplasm	enzyme	NA	NA	6009	19744	26954
RHOA	mTOR Signaling	ras homolog family member A	Q9QUI0	-0.17	0.65	Up	Cytoplasm	enzyme	NA	NA	387	11848	117273
RHOB	mTOR Signaling	ras homolog family member B	P62746	-0.13	0.82	Up	Cytoplasm	enzyme	NA	NA	388	11852	64373
RHOC	mTOR Signaling	ras homolog family member C	Q62159	0.09	0.75	Up	Plasma Membrane	enzyme	diagnosis,prognosis	NA	389	11853	295342
RHOG	mTOR Signaling	ras homolog family member G	P84096	0.04	0.74	Up	Cytoplasm	enzyme	NA	NA	391	56212	308875
RHOT1	mTOR Signaling	ras homolog family member T1	Q8BG51	-0.08	0.53	Up	Cytoplasm	enzyme	NA	NA	55288	59040	303351
RHOT2	mTOR Signaling	ras homolog family member T2	Q8JZN7	0.29	0.42	Up	Cytoplasm	enzyme	NA	NA	89941	214952	287156
RPS20	mTOR Signaling	ribosomal protein S20	P60867	-0.44	0.14	NA	Cytoplasm	other	NA	NA	6224	67427	122772
RPS21	mTOR Signaling	ribosomal protein S21	Q9CQR2	0.26	0.38	NA	Cytoplasm	other	NA	NA	6227	66481	81775
RPS23	mTOR Signaling	ribosomal protein S23	P62267	0.37	0.35	NA	Cytoplasm	translation regulator	NA	NA	6228	66475	124323
AMFR	Protein Ubiquitination Pathway	autocrine motility factor receptor	Q9R049	-0.04	0.86	NA	Plasma Membrane	transmembrane receptor	NA	NA	267	23802	361367
ANAPC1	Protein Ubiquitination Pathway	anaphase promoting complex subunit 1	P53995	0.29	0.6	NA	Nucleus	other	NA	NA	64682	17222	311412
ANAPC2	Protein Ubiquitination Pathway	anaphase promoting complex subunit 2	Q8BZQ7	0.28	0.55	NA	Nucleus	other	NA	NA	29882	99152	296558
ANAPC4	Protein Ubiquitination Pathway	anaphase promoting complex subunit 4	Q91W96	0.05	0.84	NA	Nucleus	enzyme	NA	NA	29945	52206	305420
ANAPC5	Protein Ubiquitination Pathway	anaphase promoting complex subunit 5	Q8BTZ4	-0.05	0.76	NA	Nucleus	other	NA	NA	51433	59008	288671
B2M	Protein Ubiquitination Pathway	beta-2-microglobulin	P01887	0.54	0.06	NA	Plasma Membrane	transmembrane receptor	disease progression,efficacy,safety,unspecified application	4'-iodo-4'-deoxydoxorubicin	567	12010	24223
BAG1	Protein Ubiquitination Pathway	BAG cochaperone 1	Q60739	0.04	0.87	NA	Cytoplasm	other	NA	NA	573	12017	297994
BIRC6	Protein Ubiquitination Pathway	baculoviral IAP repeat containing 6	O88738	-0.14	0.62	NA	Cytoplasm	enzyme	NA	NA	57448	12211	313876
CBL	Protein Ubiquitination Pathway	Cbl proto-oncogene	P22682	-0.17	0.39	NA	Nucleus	enzyme	NA	NA	867	12402	500985
CDC23	Protein Ubiquitination Pathway	cell division cycle 23	Q8BGZ4	-0.58	0.1	NA	Nucleus	enzyme	NA	NA	8697	52563	291689
CRYAB	Protein Ubiquitination Pathway	crystallin alpha B	P23927	-0.16	0.49	NA	Nucleus	other	diagnosis,disease progression,prognosis,unspecified application	NA	1410	12955	25420
CUL1	Protein Ubiquitination Pathway	cullin 1	Q9WTX6	0.09	0.54	NA	Nucleus	enzyme	diagnosis	NA	8454	26965	362356
CUL2	Protein Ubiquitination Pathway	cullin 2	Q9D4H8	-0.52	0.04	NA	Nucleus	enzyme	NA	NA	8453	71745	361258
DNAJA1	Protein Ubiquitination Pathway	DnaJ heat shock protein family (Hsp40) member A1	P63037	-0.03	0.86	NA	Nucleus	other	NA	NA	3301	15502	65028
DNAJB11	Protein Ubiquitination Pathway	DnaJ heat shock protein family (Hsp40) member B11	Q99KV1	0.14	0.6	NA	Cytoplasm	other	NA	NA	51726	67838	360734
DNAJB12	Protein Ubiquitination Pathway	DnaJ heat shock protein family (Hsp40) member B12	Q9QYI4	-0.44	0.04	NA	Cytoplasm	other	unspecified application	NA	54788	56709	294513
DNAJB2	Protein Ubiquitination Pathway	DnaJ heat shock protein family (Hsp40) member B2	Q9QYI5	-0.08	0.72	NA	Nucleus	other	NA	NA	3300	56812	689593
DNAJB4	Protein Ubiquitination Pathway	DnaJ heat shock protein family (Hsp40) member B4	Q9D832	0.02	0.96	NA	Nucleus	other	NA	NA	11080	67035	295549
DNAJB6	Protein Ubiquitination Pathway	DnaJ heat shock protein family (Hsp40) member B6	O54946	-1.06	0.14	NA	Nucleus	transcription regulator	NA	NA	10049	23950	362293
DNAJC10	Protein Ubiquitination Pathway	DnaJ heat shock protein family (Hsp40) member C10	Q9DC23	0.08	0.71	NA	Cytoplasm	enzyme	NA	NA	54431	66861	295690
DNAJC11	Protein Ubiquitination Pathway	NA	Q5U458	-0.78	0.41	NA	Other	other	NA	NA	NA	NA	NA
DNAJC13	Protein Ubiquitination Pathway	DnaJ heat shock protein family (Hsp40) member C13	D4AFX7	0.25	0.04	NA	Cytoplasm	other	NA	NA	23317	235567	363127
DNAJC16	Protein Ubiquitination Pathway	DnaJ heat shock protein family (Hsp40) member C16	Q80TN4	-0.07	0.88	NA	Cytoplasm	other	NA	NA	23341	214063	362652
DNAJC19	Protein Ubiquitination Pathway	NA	Q9CQV7	1.34	0.12	NA	Other	other	NA	NA	NA	NA	NA
DNAJC2	Protein Ubiquitination Pathway	DnaJ heat shock protein family (Hsp40) member C2	P54103	-0.46	0.39	NA	Nucleus	transcription regulator	NA	NA	27000	22791	116456
DNAJC3	Protein Ubiquitination Pathway	DnaJ heat shock protein family (Hsp40) member C3	Q91YW3	0.09	0.64	NA	Cytoplasm	other	NA	NA	5611	100037258	63880
DNAJC7	Protein Ubiquitination Pathway	DnaJ heat shock protein family (Hsp40) member C7	Q9QYI3	0	1	NA	Cytoplasm	other	NA	NA	7266	56354	303536
DNAJC8	Protein Ubiquitination Pathway	DnaJ heat shock protein family (Hsp40) member C8	Q6NZB0	-0.65	0.05	NA	Nucleus	other	NA	NA	22826	68598	313035
DNAJC9	Protein Ubiquitination Pathway	DnaJ heat shock protein family (Hsp40) member C9	Q91WN1	-0.21	0.66	NA	Nucleus	other	NA	NA	23234	108671	364240
ELOC	Protein Ubiquitination Pathway	NA	P83940	-1.02	0.11	NA	Other	other	NA	NA	NA	NA	NA
HLA-A	Protein Ubiquitination Pathway	major histocompatibility complex, class I, A	P14429	0.29	0.41	NA	Plasma Membrane	other	efficacy,response to therapy	tebentafusp	3105	14963|14964|14972|15006|15007|15013|15015|15018|69717|110557|667977	24973|24974|309603|309607|368153|414779|414783|414789|414790|414792|414793|414819
HLA-E	Protein Ubiquitination Pathway	NA	P06339	0.19	0.8	NA	Other	other	NA	NA	NA	NA	NA
HSCB	Protein Ubiquitination Pathway	HscB mitochondrial iron-sulfur cluster cochaperone	Q8K3A0	0.03	0.84	NA	Cytoplasm	other	NA	NA	150274	100900	360826
HSP90AB1	Protein Ubiquitination Pathway	heat shock protein 90 alpha family class B member 1	P11499	0.34	0.03	NA	Cytoplasm	enzyme	NA	alvespimycin,cisplatin,pimitespib,retaspimycin	3326	15516	301252
HSP90B1	Protein Ubiquitination Pathway	heat shock protein 90 beta family member 1	P08113	0.44	0.01	NA	Cytoplasm	other	NA	alvespimycin,cisplatin,retaspimycin	7184	22027	362862
HSPA12A	Protein Ubiquitination Pathway	heat shock protein family A (Hsp70) member 12A	Q8K0U4	-0.31	0.14	NA	Cytoplasm	other	NA	NA	259217	73442	307997
HSPA12B	Protein Ubiquitination Pathway	heat shock protein family A (Hsp70) member 12B	Q9CZJ2	-0.34	0.08	NA	Other	other	NA	NA	116835	72630	311427
HSPA13	Protein Ubiquitination Pathway	heat shock protein family A (Hsp70) member 13	Q8BM72	-0.15	0.65	NA	Cytoplasm	other	NA	NA	6782	110920	29734
HSPA4L	Protein Ubiquitination Pathway	heat shock protein family A (Hsp70) member 4 like	P48722	-0.22	0.5	NA	Cytoplasm	other	NA	NA	22824	18415	294993
HSPB1	Protein Ubiquitination Pathway	heat shock protein family B (small) member 1	P14602	-0.15	0.3	NA	Cytoplasm	other	diagnosis,efficacy	NA	3315	15507	24471
HSPB2	Protein Ubiquitination Pathway	heat shock protein family B (small) member 2	Q99PR8	0.31	0.58	NA	Cytoplasm	other	NA	NA	3316	69253	161476
HSPB6	Protein Ubiquitination Pathway	heat shock protein family B (small) member 6	Q5EBG6	0.76	0.35	NA	Cytoplasm	other	NA	NA	126393	243912	192245
HSPB8	Protein Ubiquitination Pathway	heat shock protein family B (small) member 8	Q9JK92	1.88	0.07	NA	Cytoplasm	kinase	NA	NA	26353	80888	113906
HSPD1	Protein Ubiquitination Pathway	heat shock protein family D (Hsp60) member 1	P63038	-0.1	0.51	NA	Cytoplasm	enzyme	diagnosis,prognosis	NA	3329	15510	63868
HSPE1	Protein Ubiquitination Pathway	heat shock protein family E (Hsp10) member 1	Q64433	0.26	0.19	NA	Cytoplasm	enzyme	NA	NA	3336	15528	25462
HSPH1	Protein Ubiquitination Pathway	heat shock protein family H (Hsp110) member 1	Q61699	0.33	0.23	NA	Cytoplasm	other	NA	NA	10808	15505	288444
NEDD4L	Protein Ubiquitination Pathway	NEDD4 like E3 ubiquitin protein ligase	Q8CFI0	-2.3	0.06	NA	Cytoplasm	enzyme	NA	NA	23327	83814	291553
RPS27A	Protein Ubiquitination Pathway	ribosomal protein S27a	P62983	1.54	0.06	NA	Cytoplasm	other	NA	NA	6233	78294	100912032
SKP1	Protein Ubiquitination Pathway	S-phase kinase associated protein 1	Q9WTX5	-0.59	0.02	NA	Nucleus	transcription regulator	NA	NA	6500	21402	287280
SMURF1	Protein Ubiquitination Pathway	SMAD specific E3 ubiquitin protein ligase 1	Q9CUN6	-0.79	0.2	NA	Cytoplasm	enzyme	NA	NA	57154	75788	690516
MAPK14	Regulation of elF4 and p70S6K Signalling	mitogen-activated protein kinase 14	P47811	0.11	0.47	NA	Cytoplasm	kinase	efficacy,unspecified application	AMG 2372,ARRY-371797,CGH2466,Org 48762-0,p38 MAP kinase inhibitor,p38 MAP kinase inhibitor IV,pamapimod,PH-797804,ralimetinib,RO-3201195,Sb202190,talmapimod,UM101	1432	26416	81649
ITGA1	Regulation of elF4 and p70S6K Signalling	integrin subunit alpha 1	Q3V3R4	-0.23	0.08	NA	Plasma Membrane	other	NA	NA	3672	109700	25118
ITGA2	Regulation of elF4 and p70S6K Signalling	integrin subunit alpha 2	Q62469	0.51	0.22	Up	Plasma Membrane	transmembrane receptor	NA	NA	3673	16398	170921
ITGA3	Regulation of elF4 and p70S6K Signalling	integrin subunit alpha 3	Q62470	-0.19	0.14	Up	Plasma Membrane	other	prognosis	NA	3675	16400	360606
ITGA5	Regulation of elF4 and p70S6K Signalling	integrin subunit alpha 5	P11688	-0.01	0.95	Up	Plasma Membrane	transmembrane receptor	prognosis	NA	3678	16402	315346
ITGA6	Regulation of elF4 and p70S6K Signalling	integrin subunit alpha 6	Q61739	-0.05	0.71	NA	Plasma Membrane	transmembrane receptor	NA	NA	3655	16403	114517
ITGA7	Regulation of elF4 and p70S6K Signalling	integrin subunit alpha 7	Q61738	-0.42	0.03	NA	Plasma Membrane	other	NA	NA	3679	16404	81008
ITGAL	Regulation of elF4 and p70S6K Signalling	integrin subunit alpha L	P24063	-0.13	0.51	NA	Plasma Membrane	transmembrane receptor	NA	efalizumab,lifitegrast	3683	16408	308995
ITGAM	Regulation of elF4 and p70S6K Signalling	integrin subunit alpha M	P05555	0.33	0.1	NA	Plasma Membrane	transmembrane receptor	efficacy,unspecified application	abciximab,GB1275	3684	16409	25021
ITGAV	Regulation of elF4 and p70S6K Signalling	integrin subunit alpha V	P43406	0.1	0.52	NA	Plasma Membrane	transmembrane receptor	diagnosis	68Ga-NOTA-BBN-RGD,abciximab,abituzumab,cilengitide,etaracizumab,fluciclatide F 18,intetumumab	3685	16410	296456
ITGAX	Regulation of elF4 and p70S6K Signalling	integrin subunit alpha X	Q9QXH4	0.37	0.49	NA	Plasma Membrane	transmembrane receptor	unspecified application	NA	3687	16411	499271
ITGB1	Regulation of elF4 and p70S6K Signalling	integrin subunit beta 1	P09055	-0.04	0.75	Up	Plasma Membrane	transmembrane receptor	disease progression,prognosis	OS2966	3688	16412	24511
ITGB2	Regulation of elF4 and p70S6K Signalling	integrin subunit beta 2	P11835	0.58	0.04	NA	Plasma Membrane	transmembrane receptor	NA	NA	3689	16414	309684
ITGB3	Regulation of elF4 and p70S6K Signalling	integrin subunit beta 3	O54890	1.44	0.01	NA	Plasma Membrane	transmembrane receptor	unspecified application	abciximab,cilengitide,eptifibatide,tirofiban,TP 9201,zalunfiban	3690	16416	29302
ITGB4	Regulation of elF4 and p70S6K Signalling	integrin subunit beta 4	A2A863	-0.26	0.31	NA	Plasma Membrane	transmembrane receptor	diagnosis	NA	3691	192897	25724
ITGB5	Regulation of elF4 and p70S6K Signalling	integrin subunit beta 5	O70309	-0.55	0.13	NA	Plasma Membrane	other	diagnosis	cilengitide	3693	16419	257645
IRS1	Regulation of elF4 and p70S6K Signalling	insulin receptor substrate 1	P35569	0.27	0.49	Up	Cytoplasm	enzyme	efficacy	NT219	3667	16367	25467
PPP2CA	Regulation of elF4 and p70S6K Signalling	protein phosphatase 2 catalytic subunit alpha	P63330	-0.22	0.22	Down	Cytoplasm	phosphatase	NA	NA	5515	19052	24672
PPP2R1A	Regulation of elF4 and p70S6K Signalling	protein phosphatase 2 scaffold subunit Aalpha	Q76MZ3	0.14	0.39	Down	Cytoplasm	phosphatase	NA	NA	5518	51792	117281
PPP2R1B	Regulation of elF4 and p70S6K Signalling	protein phosphatase 2 scaffold subunit Abeta	Q7TNP2	-0.27	0.09	Down	Plasma Membrane	phosphatase	NA	NA	5519	73699	315648
PPP2R2A	Regulation of elF4 and p70S6K Signalling	protein phosphatase 2 regulatory subunit Balpha	Q6P1F6	0.06	0.74	Down	Cytoplasm	phosphatase	NA	NA	5520	71978	117104
PPP2R2D	Regulation of elF4 and p70S6K Signalling	protein phosphatase 2 regulatory subunit Bdelta	Q925E7	-0.12	0.66	NA	Nucleus	other	NA	NA	55844	52432	246255
PPP2R5A	Regulation of elF4 and p70S6K Signalling	protein phosphatase 2 regulatory subunit B'alpha	Q6PD03	-0.35	0.05	Down	Cytoplasm	phosphatase	NA	NA	5525	226849	312754
PPP2R5B	Regulation of elF4 and p70S6K Signalling	protein phosphatase 2 regulatory subunit B'beta	Q6PD28	0.02	0.98	Down	Cytoplasm	phosphatase	NA	NA	5526	225849	309179
PPP2R5D	Regulation of elF4 and p70S6K Signalling	protein phosphatase 2 regulatory subunit B'delta	Q7TNL5	-0.13	0.33	Down	Nucleus	phosphatase	NA	NA	5528	21770	363193
PPP2R5E	Regulation of elF4 and p70S6K Signalling	protein phosphatase 2 regulatory subunit B'epsilon	Q61151	-0.2	0.21	NA	Cytoplasm	phosphatase	NA	NA	5529	26932	299147
PTPA	Regulation of elF4 and p70S6K Signalling	protein phosphatase 2 phosphatase activator	P58389	-0.21	0.2	Down	Cytoplasm	phosphatase	NA	NA	5524	110854	362102
RPS10	Regulation of elF4 and p70S6K Signalling	ribosomal protein S10	P63325	0.16	0.41	NA	Cytoplasm	other	NA	NA	6204	67097	81773
RPS11	Regulation of elF4 and p70S6K Signalling	ribosomal protein S11	P62281	0.17	0.27	NA	Cytoplasm	other	NA	NA	6205	27207	81774
RPS12	Regulation of elF4 and p70S6K Signalling	ribosomal protein S12	P63323	0.69	0.3	NA	Cytoplasm	other	NA	neomycin	6206	20042	65139
RPS13	Regulation of elF4 and p70S6K Signalling	ribosomal protein S13	P62301	-0.37	0.11	NA	Cytoplasm	other	NA	NA	6207	68052	161477
RPS14	Regulation of elF4 and p70S6K Signalling	ribosomal protein S14	P62264	0.17	0.36	NA	Cytoplasm	translation regulator	NA	NA	6208	20044	29284
RPS15	Regulation of elF4 and p70S6K Signalling	ribosomal protein S15	P62843	0.02	0.95	NA	Cytoplasm	other	NA	NA	6209	20054	29285
RPS16	Regulation of elF4 and p70S6K Signalling	ribosomal protein S16	P14131	-0.46	0.1	NA	Cytoplasm	other	NA	NA	6217	20055	140655
RPS17	Regulation of elF4 and p70S6K Signalling	ribosomal protein S17	P63276	-0.24	0.27	NA	Cytoplasm	other	NA	NA	6218	20068	29286
RPS18	Regulation of elF4 and p70S6K Signalling	NA	P62270	0.39	0.21	NA	Other	other	NA	NA	NA	NA	NA
RPS19	Regulation of elF4 and p70S6K Signalling	ribosomal protein S19	Q9CZX8	0.22	0.44	NA	Cytoplasm	other	NA	NA	6223	20085	29287
RPS2	Regulation of elF4 and p70S6K Signalling	ribosomal protein S2	P25444	0.31	0.26	NA	Cytoplasm	other	NA	NA	6187	16898	83789
RPS3	Regulation of elF4 and p70S6K Signalling	ribosomal protein S3	P62908	0.23	0.11	NA	Cytoplasm	enzyme	unspecified application	NA	6188	27050	140654
RPS5	Regulation of elF4 and p70S6K Signalling	ribosomal protein S5	P97461	0.24	0.82	NA	Cytoplasm	other	NA	NA	6193	20103	25538
RPS6	Regulation of elF4 and p70S6K Signalling	ribosomal protein S6	P62754	0.34	0.62	Up	Cytoplasm	other	efficacy,response to therapy	NA	6194	20104	29304
RPS7	Regulation of elF4 and p70S6K Signalling	NA	P62082	0.12	0.61	NA	Other	other	NA	NA	NA	NA	NA
RPS8	Regulation of elF4 and p70S6K Signalling	ribosomal protein S8	P62242	0.45	0.41	NA	Cytoplasm	other	NA	NA	6202	20116	65136
RPS9	Regulation of elF4 and p70S6K Signalling	ribosomal protein S9	Q6ZWN5	0.36	0.03	NA	Cytoplasm	translation regulator	NA	NA	6203	76846	103689992
MTOR	Regulation of elF4 and p70S6K Signalling	mechanistic target of rapamycin kinase	Q9JLN9	-0.44	0.13	Up	Nucleus	kinase	efficacy	apitolisib,AZD8055,bimiralisib,CLL442,corticosteroid/everolimus/tacrolimus,corticosteroid/sirolimus,cyclosporine A/sirolimus/tacrolimus,CZ415,dactolisib,DS-7423,ETP-45658,everolimus,everolimus/exemestane,everolimus/fulvestrant,everolimus/gefitinib,everolimus/lenvatinib,everolimus/letrozole,everolimus/paclitaxel,everolimus/pasireotide,everolimus/prednisone,everolimus/ribociclib,everolimus/sorafeni…	2475	56717	56718
ABCA1	Sirtuin Signalling Pathway	ATP binding cassette subfamily A member 1	P41233	-0.02	0.95	Up	Plasma Membrane	transporter	NA	probucol	19	11303	313210
ACLY	Sirtuin Signalling Pathway	ATP citrate lyase	Q91V92	0.05	0.89	Down	Cytoplasm	enzyme	unspecified application	bempedoic acid,bempedoic acid/ezetimibe,bempedoyl-CoA	47	104112	24159
ACSS2	Sirtuin Signalling Pathway	acyl-CoA synthetase short chain family member 2	Q9QXG4	-0.17	0.51	Up	Cytoplasm	enzyme	NA	MTB-9655	55902	60525	311569
ADAM10	Sirtuin Signalling Pathway	ADAM metallopeptidase domain 10	O35598	0.07	0.79	NA	Plasma Membrane	peptidase	NA	aderbasib	102	11487	29650
APEX1	Sirtuin Signalling Pathway	apurinicapyrimidinic endodeoxyribonuclease 1	P28352	-0.03	0.77	NA	Nucleus	enzyme	NA	E 3330,lucanthone	328	11792	79116
ATG16L1	Sirtuin Signalling Pathway	autophagy related 16 like 1	Q8C0J2	-0.91	0.07	Up	Cytoplasm	enzyme	NA	NA	55054	77040	363278
ATG3	Sirtuin Signalling Pathway	autophagy related 3	Q9CPX6	-0.45	0.07	Up	Cytoplasm	enzyme	NA	NA	64422	67841	171415
ATG4B	Sirtuin Signalling Pathway	autophagy related 4B cysteine peptidase	Q8BGE6	0.57	0.28	Up	Cytoplasm	peptidase	NA	NA	23192	66615	316640
ATG5	Sirtuin Signalling Pathway	autophagy related 5	Q99J83	0.51	0.33	Up	Cytoplasm	enzyme	NA	NA	9474	11793	365601
ATG7	Sirtuin Signalling Pathway	autophagy related 7	Q9D906	-0.09	0.56	Up	Cytoplasm	enzyme	NA	NA	10533	74244	312647
BPGM	Sirtuin Signalling Pathway	bisphosphoglycerate mutase	P15327	-0.04	0.77	Up	Extracellular Space	phosphatase	NA	NA	669	12183	296973
CDH1	Sirtuin Signalling Pathway	cadherin 1	P09803	-0.65	0.12	Up	Plasma Membrane	other	diagnosis,disease progression,efficacy,prognosis	NA	999	12550	83502
CPS1	Sirtuin Signalling Pathway	carbamoyl-phosphate synthase 1	Q8C196	0.23	0.73	Up	Cytoplasm	enzyme	unspecified application	N-carbamyl-L-glutamate	1373	227231	497840
CPT1A	Sirtuin Signalling Pathway	carnitine palmitoyltransferase 1A	P97742	0.2	0.49	NA	Cytoplasm	enzyme	unspecified application	perhexiline	1374	12894	25757
CPT1B	Sirtuin Signalling Pathway	carnitine palmitoyltransferase 1B	Q924X2	-0.11	0.54	NA	Cytoplasm	enzyme	unspecified application	NA	1375	12895	25756
G6PD	Sirtuin Signalling Pathway	glucose-6-phosphate dehydrogenase	Q00612	-0.07	0.56	NA	Cytoplasm	enzyme	NA	NA	2539	14381	24377
GABARAP	Sirtuin Signalling Pathway	GABA type A receptor-associated protein	Q9DCD6	0.08	0.88	Up	Cytoplasm	transporter	NA	NA	11337	56486	58974
GABARAPL2	Sirtuin Signalling Pathway	GABA type A receptor associated protein like 2	P60521	0	0.99	Up	Cytoplasm	other	NA	NA	11345	93739	64670
GABPA	Sirtuin Signalling Pathway	GA binding protein transcription factor subunit alpha	Q00422	-2.46	0.04	Up	Nucleus	transcription regulator	NA	NA	2551	14390	363735
GLUD1	Sirtuin Signalling Pathway	glutamate dehydrogenase 1	P26443	-0.11	0.52	NA	Cytoplasm	enzyme	unspecified application	NA	2746	14661	24399
GOT2	Sirtuin Signalling Pathway	glutamic-oxaloacetic transaminase 2	P05202	0.58	0.07	Down	Cytoplasm	enzyme	NA	NA	2806	14719	25721
H1-0	Sirtuin Signalling Pathway	H1.0 linker histone	P10922	-0.06	0.85	Up	Nucleus	other	NA	NA	3005	14958	24437
H1-2	Sirtuin Signalling Pathway	H1.2 linker histone, cluster member	P15864	0.1	0.48	Up	Nucleus	other	NA	NA	3006	50708	684681
H1-3	Sirtuin Signalling Pathway	NA	P43277	0.11	0.35	Up	Other	other	NA	NA	NA	NA	NA
H1f4	Sirtuin Signalling Pathway	NA	P43274	0.43	0.2	Up	Other	other	NA	NA	NA	NA	NA
HMGCS2	Sirtuin Signalling Pathway	3-hydroxy-3-methylglutaryl-CoA synthase 2	P54869	0.67	0.2	Up	Cytoplasm	enzyme	unspecified application	NA	3158	15360	24450
LDHA	Sirtuin Signalling Pathway	lactate dehydrogenase A	P06151	0.2	0.49	Down	Cytoplasm	enzyme	efficacy,unspecified application	nedosiran	3939	16828	24533
LDHB	Sirtuin Signalling Pathway	lactate dehydrogenase B	P16125	-0.26	0.15	Down	Cytoplasm	enzyme	unspecified application	NA	3945	16832	24534
LDHC	Sirtuin Signalling Pathway	lactate dehydrogenase C	P00342	0.29	0.26	Down	Cytoplasm	enzyme	diagnosis	NA	3948	16833	29634
LDHD	Sirtuin Signalling Pathway	lactate dehydrogenase D	Q7TNG8	0.14	0.74	Down	Cytoplasm	enzyme	NA	NA	197257	52815	307858
MAP1LC3A	Sirtuin Signalling Pathway	microtubule associated protein 1 light chain 3 alpha	Q91VR7	-0.38	0.42	Up	Cytoplasm	other	efficacy	NA	84557	66734	362245
MAP1LC3B	Sirtuin Signalling Pathway	microtubule associated protein 1 light chain 3 beta	Q9CQV6	0.13	0.48	Up	Cytoplasm	other	NA	NA	81631	67443	64862
MLYCD	Sirtuin Signalling Pathway	malonyl-CoA decarboxylase	Q99J39	-0.25	0.29	Down	Cytoplasm	enzyme	NA	NA	23417	56690	85239
MT-ND1	Sirtuin Signalling Pathway	NADH dehydrogenase subunit 1	P03888	-0.18	0.1	Down	Cytoplasm	enzyme	unspecified application	NA	4535	17716	26193
MT-ND2	Sirtuin Signalling Pathway	NADH dehydrogenase subunit 2	P03893	0.17	0.64	Down	Cytoplasm	enzyme	unspecified application	NA	4536	17717	26194
MT-ND4	Sirtuin Signalling Pathway	NADH dehydrogenase subunit 4	P03911	-0.24	0.18	Down	Cytoplasm	enzyme	unspecified application	NA	4538	17719	26201
MT-ND5	Sirtuin Signalling Pathway	NADH dehydrogenase subunit 5	P03921	0.23	0.24	Down	Cytoplasm	enzyme	unspecified application	NA	4540	17721	26202
NAMPT	Sirtuin Signalling Pathway	nicotinamide phosphoribosyltransferase	Q99KQ4	-0.26	0.09	Up	Extracellular Space	cytokine	diagnosis,prognosis	daporinad,KPT-9274,OT-82,STF-118804	10135	59027	297508
NDRG1	Sirtuin Signalling Pathway	N-myc downstream regulated 1	Q62433	0.21	0.23	Up	Nucleus	kinase	NA	NA	10397	17988	299923
NDUFA10	Sirtuin Signalling Pathway	NA	Q99LC3	-0.32	0.02	Down	Other	other	NA	NA	NA	NA	NA
NDUFA11	Sirtuin Signalling Pathway	NA	Q9D8B4	0.28	0.49	Down	Other	other	NA	NA	NA	NA	NA
NDUFA12	Sirtuin Signalling Pathway	NADH:ubiquinone oxidoreductase subunit A12	Q7TMF3	-0.34	0.05	Down	Cytoplasm	enzyme	NA	NA	55967	66414	299739
NDUFA13	Sirtuin Signalling Pathway	NADH:ubiquinone oxidoreductase subunit A13	Q9ERS2	0.03	0.89	Down	Cytoplasm	enzyme	NA	NA	51079	67184	100911483
NDUFA2	Sirtuin Signalling Pathway	NADH:ubiquinone oxidoreductase subunit A2	Q9CQ75	0.13	0.81	Down	Cytoplasm	enzyme	NA	NA	4695	17991	291660
NDUFA3	Sirtuin Signalling Pathway	NADH:ubiquinone oxidoreductase subunit A3	Q9CQ91	0.17	0.44	Down	Cytoplasm	enzyme	NA	NA	4696	66091	691001
NDUFA4	Sirtuin Signalling Pathway	NDUFA4 mitochondrial complex associated	Q62425	0.47	0.63	Down	Cytoplasm	enzyme	NA	NA	4697	17992	681024
NDUFA5	Sirtuin Signalling Pathway	NADH:ubiquinone oxidoreductase subunit A5	Q9CPP6	-0.06	0.67	Down	Cytoplasm	enzyme	NA	NA	4698	68202	25488
NDUFA6	Sirtuin Signalling Pathway	NADH:ubiquinone oxidoreductase subunit A6	Q9CQZ5	0.9	0.17	Down	Cytoplasm	enzyme	NA	NA	4700	67130	315167
NDUFA7	Sirtuin Signalling Pathway	NADH:ubiquinone oxidoreductase subunit A7	Q9Z1P6	0.14	0.8	Down	Cytoplasm	enzyme	NA	NA	4701	66416	299643
NDUFA8	Sirtuin Signalling Pathway	NADH:ubiquinone oxidoreductase subunit A8	Q9DCJ5	-0.04	0.9	Down	Cytoplasm	enzyme	NA	NA	4702	68375	296658
NDUFA9	Sirtuin Signalling Pathway	NADH:ubiquinone oxidoreductase subunit A9	Q9DC69	-0.14	0.32	Up	Cytoplasm	enzyme	NA	NA	4704	66108	362440
NDUFAB1	Sirtuin Signalling Pathway	NA	Q9CR21	-0.48	0.42	Down	Other	other	NA	NA	NA	NA	NA
NDUFAF1	Sirtuin Signalling Pathway	NADH:ubiquinone oxidoreductase complex assembly factor 1	Q9CWX2	0.01	0.97	Down	Cytoplasm	other	NA	NA	51103	69702	296086
NDUFB1	Sirtuin Signalling Pathway	NADH:ubiquinone oxidoreductase subunit B1	P0DN34	0.47	0.18	Down	Cytoplasm	enzyme	NA	NA	4707	102631912	100912357
NDUFB10	Sirtuin Signalling Pathway	NADH:ubiquinone oxidoreductase subunit B10	Q9DCS9	0.39	0.51	Down	Cytoplasm	enzyme	NA	NA	4716	68342	681418
NDUFB11	Sirtuin Signalling Pathway	NADH:ubiquinone oxidoreductase subunit B11	O09111	-0.4	0.76	Down	Cytoplasm	enzyme	NA	NA	54539	104130	299310
NDUFB3	Sirtuin Signalling Pathway	NADH:ubiquinone oxidoreductase subunit B3	Q9CQZ6	-0.04	0.88	Down	Cytoplasm	enzyme	NA	NA	4709	66495	301427
NDUFB4	Sirtuin Signalling Pathway	NA	Q9CQC7	-0.15	0.59	Down	Other	other	NA	NA	NA	NA	NA
NDUFB5	Sirtuin Signalling Pathway	NADH:ubiquinone oxidoreductase subunit B5	Q9CQH3	-0.21	0.49	Down	Cytoplasm	enzyme	NA	NA	4711	66046	294964
NDUFB6	Sirtuin Signalling Pathway	NADH:ubiquinone oxidoreductase subunit B6	Q3UIU2	0.31	0.28	Down	Cytoplasm	enzyme	NA	NA	4712	230075	297990
NDUFB7	Sirtuin Signalling Pathway	NADH:ubiquinone oxidoreductase subunit B7	Q9CR61	0.39	0.45	Down	Cytoplasm	enzyme	NA	NA	4713	66916	361385
NDUFB8	Sirtuin Signalling Pathway	NADH:ubiquinone oxidoreductase subunit B8	Q9D6J5	-0.32	0.1	Down	Cytoplasm	enzyme	NA	NA	4714	67264	293991
NDUFB9	Sirtuin Signalling Pathway	NADH:ubiquinone oxidoreductase subunit B9	Q9CQJ8	-0.49	0.38	Down	Cytoplasm	enzyme	NA	NA	4715	66218	299954
NDUFS1	Sirtuin Signalling Pathway	NADH:ubiquinone oxidoreductase core subunit S1	Q91VD9	-0.14	0.29	Down	Cytoplasm	enzyme	NA	NA	4719	227197	301458
NDUFS2	Sirtuin Signalling Pathway	NADH:ubiquinone oxidoreductase core subunit S2	Q91WD5	-0.14	0.3	Down	Cytoplasm	enzyme	NA	NA	4720	226646	289218
NDUFS3	Sirtuin Signalling Pathway	NADH:ubiquinone oxidoreductase core subunit S3	Q9DCT2	-0.24	0.26	Down	Cytoplasm	enzyme	NA	NA	4722	68349	295923
NDUFS4	Sirtuin Signalling Pathway	NADH:ubiquinone oxidoreductase subunit S4	Q9CXZ1	0.31	0.47	Down	Cytoplasm	enzyme	NA	NA	4724	17993	499529
NDUFS6	Sirtuin Signalling Pathway	NA	P52503	0.86	0.1	Down	Other	other	NA	NA	NA	NA	NA
NDUFS7	Sirtuin Signalling Pathway	NADH:ubiquinone oxidoreductase core subunit S7	Q9DC70	0.15	0.49	Down	Cytoplasm	enzyme	NA	NA	374291	75406	362837
NDUFS8	Sirtuin Signalling Pathway	NADH:ubiquinone oxidoreductase core subunit S8	Q8K3J1	0.01	0.93	Down	Cytoplasm	enzyme	NA	NA	4728	225887	293652
NDUFV1	Sirtuin Signalling Pathway	NADH:ubiquinone oxidoreductase core subunit V1	Q91YT0	-0.21	0.21	Down	Cytoplasm	enzyme	NA	NA	4723	17995	293655
NDUFV2	Sirtuin Signalling Pathway	NADH:ubiquinone oxidoreductase core subunit V2	Q9D6J6	0.74	0.16	Down	Cytoplasm	enzyme	NA	NA	4729	72900	81728
NDUFV3	Sirtuin Signalling Pathway	NADH:ubiquinone oxidoreductase subunit V3	Q8BK30	-1.21	0.1	Down	Cytoplasm	enzyme	NA	NA	4731	78330	64539
NOS3	Sirtuin Signalling Pathway	nitric oxide synthase 3	P70313	-0.56	0.02	Up	Cytoplasm	enzyme	disease progression,prognosis	5,6,7,8-tetrahydrobiopterin,GW 273629,N(G)-monomethyl-D-arginine	4846	18127	24600
NQO1	Sirtuin Signalling Pathway	NAD(P)H quinone dehydrogenase 1	Q64669	-0.43	0.03	Up	Cytoplasm	enzyme	diagnosis,unspecified application	NA	1728	18104	24314
OTC	Sirtuin Signalling Pathway	ornithine transcarbamylase	P11725	2.33	0.09	Up	Cytoplasm	enzyme	NA	NA	5009	18416	25611
PAM16	Sirtuin Signalling Pathway	presequence translocase associated motor 16	Q9CQV1	0.41	0.51	NA	Cytoplasm	other	NA	NA	51025	66449	679907
PARP1	Sirtuin Signalling Pathway	poly(ADP-ribose) polymerase 1	P11103	0.84	0.08	Up	Nucleus	enzyme	diagnosis,efficacy,prognosis	2X-121,[18F]fluorthanatrace,ABT-767,amelparib,AMXI-5001,AZD9574,CEP-9722,fluzoparib,HS-10502,IDX-1197,iniparib,niraparib,olaparib,poly ADP ribose polymerase 1 inhibitor,RP12146,rucaparib,SC10914,senaparib,simmiparib,talazoparib,TQB3823,veliparib	142	11545	25591
